# Supplementary material for: A crossed molecular beam and ab initio investigation of the exclusive methyl loss pathway in the gas phase reaction of boron monoxide (BO; X2Σ+) with dimethylacetylene (CH3CCCH3; X1A1g)
Source: Royal Society of Chemistry journal article supplement (doi:10.1039/c3cp53930j), 2013-11-07
Supplement: c3cp53930j.pdf [file c3cp53930j.pdf]

*Supporting Information for*

**A Crossed Molecular Beam and Ab-Initio Investigation on the Exclusive Methyl  
Loss Pathway in the Gas Phase Reaction of Boron Monoxide (BO; X<sup>2</sup>Σ<sup>+</sup>) with  
Dimethylacetylene (CH<sub>3</sub>CCCH<sub>3</sub>; X<sup>1</sup>A<sub>1g</sub>)**

**Ralf I. Kaiser,\* Surajit Maity, Beni B. Dangi**

*Department of Chemistry, University of Hawai'i at Manoa, Honolulu, HI 96822, USA*

**Yuan-Siang Su, B.J. Sun, Agnes H. H. Chang \***

*Department of Chemistry, National Dong Hwa University, Hualien, 974, Taiwan*

**Table S1:** Cartesian coordinates of structures optimized at B3LYP/cc-pVTZ (except  
i1 at CCSD/6-31G and p2 at MP2/cc-pVTZ)

| i1 ( <sup>2</sup> A, C <sub>1</sub> ) |          |          |           | i2 ( <sup>2</sup> A, C <sub>1</sub> ) |          |          |           |
|---------------------------------------|----------|----------|-----------|---------------------------------------|----------|----------|-----------|
|                                       | X        | Y        | Z         |                                       | X        | Y        | Z         |
| C                                     | 1.220257 | 0.122643 | -0.000072 | C                                     | -0.89917 | -0.63039 | 0.000149  |
| C                                     | 0.3621   | 1.005184 | 0.0006    | C                                     | 0.08214  | 0.246105 | 0.000065  |
| C                                     | 2.40755  | -0.77383 | 0.000587  | C                                     | -2.35614 | -0.75149 | -0.00005  |
| C                                     | -0.77751 | 1.95968  | -0.0005   | C                                     | -0.10836 | 1.760964 | -0.000034 |
| H                                     | 2.980035 | -0.66764 | 0.936788  | H                                     | -2.69988 | -1.29926 | 0.879972  |
| H                                     | 2.107646 | -1.83094 | -0.09566  | H                                     | -2.84765 | 0.229956 | -0.00146  |
| H                                     | 3.079496 | -0.5344  | -0.84002  | H                                     | -2.69941 | -1.30133 | -0.87902  |
| H                                     | -0.75082 | 2.603557 | -0.89507  | H                                     | -1.16418 | 2.025666 | 0.000123  |
| H                                     | -1.73416 | 1.412063 | 0.002802  | H                                     | 0.358556 | 2.206104 | 0.879737  |
| H                                     | -0.74783 | 2.60904  | 0.890015  | H                                     | 0.358503 | 2.206084 | -0.87985  |
| B                                     | -1.14071 | -1.59189 | -0.0038   | B                                     | 1.490328 | -0.33132 | 0.00005   |
| O                                     | -2.31315 | -1.18929 | 0.002057  | O                                     | 2.616444 | -0.77021 | -0.000066 |

**Table S1** (continued)

| i3 ( <sup>2</sup> A, C <sub>1</sub> )      |          |          |          | ts-i2i3 ( <sup>2</sup> A, C <sub>1</sub> ) |          |          |          |
|--------------------------------------------|----------|----------|----------|--------------------------------------------|----------|----------|----------|
|                                            | X        | Y        | Z        |                                            | X        | Y        | Z        |
| C                                          | 1.075975 | 0.543067 | 0.000091 | C                                          | 1.04018  | -0.1599  | 0.004993 |
| C                                          | -0.24073 | 0.541252 | -0.00015 | C                                          | -0.11683 | 0.44607  | 0.000221 |
| C                                          | 2.230394 | -0.35521 | 0.000014 | C                                          | 2.33523  | -0.80213 | -0.0034  |
| C                                          | -1.09329 | 1.796683 | 0.000065 | C                                          | -0.32801 | 1.958935 | -0.00146 |
| H                                          | 1.923297 | -1.40935 | -0.00028 | H                                          | 2.30854  | -1.78349 | -0.49167 |
| H                                          | 2.854648 | -0.18488 | -0.87968 | H                                          | 3.093718 | -0.20136 | -0.51997 |
| H                                          | 2.854453 | -0.1853  | 0.879923 | H                                          | 2.682971 | -0.95726 | 1.02097  |
| H                                          | -0.46323 | 2.68402  | 0.000107 | H                                          | 0.627051 | 2.481008 | -0.01369 |
| H                                          | -1.73908 | 1.827616 | -0.87899 | H                                          | -0.90623 | 2.263851 | -0.87535 |
| H                                          | -1.73891 | 1.82742  | 0.879252 | H                                          | -0.88478 | 2.268732 | 0.884627 |
| B                                          | -0.89911 | -0.83343 | -0.00036 | B                                          | -1.31691 | -0.49776 | 0.000081 |
| O                                          | -1.37872 | -1.94339 | 0.000164 | O                                          | -2.24002 | -1.28007 | -0.00093 |
| ts-i3p1 ( <sup>2</sup> A, C <sub>1</sub> ) |          |          |          | ts-i3p3 ( <sup>2</sup> A, C <sub>1</sub> ) |          |          |          |
|                                            | X        | Y        | Z        |                                            | X        | Y        | Z        |
| C                                          | -1.01768 | -0.34169 | 0.00000  | C                                          | -1.21919 | -0.42824 | -0.00018 |
| C                                          | 0.080903 | 0.368077 | 0.00000  | C                                          | -0.01085 | -0.19249 | -0.00127 |
| C                                          | -2.14076 | -1.01055 | 0.00000  | C                                          | -2.66635 | -0.43377 | 0.000042 |
| C                                          | 0.086575 | 1.889358 | 0.00000  | C                                          | 0.545516 | 1.986583 | 0.000436 |
| H                                          | -2.58265 | -1.35862 | 0.92517  | H                                          | -3.05197 | -0.95459 | -0.87851 |
| H                                          | -3.68871 | 0.440318 | 0.00000  | H                                          | -3.05143 | -0.94345 | 0.885345 |
| H                                          | -2.58265 | -1.35862 | -0.92517 | H                                          | -3.06846 | 0.584272 | -0.00601 |
| H                                          | -0.92978 | 2.276577 | 0.00000  | H                                          | -0.42958 | 2.411819 | -0.18411 |
| H                                          | 0.606628 | 2.270233 | 0.879857 | H                                          | 0.93937  | 2.086352 | 1.001568 |
| H                                          | 0.606628 | 2.270233 | -0.87986 | H                                          | 1.256744 | 2.035062 | -0.812   |
| B                                          | 1.392428 | -0.40212 | 0.00000  | B                                          | 1.400266 | -0.62754 | -0.00025 |
| O                                          | 2.444267 | -0.99508 | 0.00000  | O                                          | 2.563653 | -0.95928 | 0.000099 |

**Table S1** (continued)

| ts-rp2 ( ${}^2A, C_1$ )             |          |          |          | p1 ( ${}^1A, C_1$ )                                        |          |          |          |
|-------------------------------------|----------|----------|----------|------------------------------------------------------------|----------|----------|----------|
|                                     | X        | Y        | Z        |                                                            | X        | Y        | Z        |
| C                                   | -1.96514 | -0.0339  | 0.000031 | C                                                          | 1.126788 | -0.27598 | -0.00113 |
| C                                   | -0.93011 | 0.583756 | 0.000029 | C                                                          | -0.00469 | 0.384413 | -0.00055 |
| C                                   | 0.320737 | 1.271657 | 0.000015 | C                                                          | 2.243048 | -0.93792 | 0.000563 |
| C                                   | -3.22139 | -0.76443 | 0.000003 | C                                                          | -0.07971 | 1.902198 | 0.000476 |
| H                                   | 0.508476 | 1.860117 | 0.897246 | H                                                          | 2.727638 | -1.22593 | -0.9246  |
| H                                   | 0.508277 | 1.860433 | -0.89705 | H                                                          | 0.91807  | 2.335765 | 0.001251 |
| H                                   | -3.04223 | -1.84159 | -0.00191 | B                                                          | -1.27951 | -0.44298 | -0.0015  |
| H                                   | -3.81472 | -0.5271  | 0.884601 | O                                                          | -2.3066  | -1.07848 | 0.000751 |
| H                                   | -3.81631 | -0.52425 | -0.88276 | H                                                          | -0.61565 | 2.262078 | -0.8789  |
| B                                   | 2.604719 | -0.40266 | -0.00029 | H                                                          | 2.724008 | -1.22623 | 0.927555 |
| O                                   | 3.773065 | -0.70191 | 0.000139 | H                                                          | -0.61636 | 2.260721 | 0.879998 |
| H                                   | 1.223814 | 0.45843  | -0.00024 |                                                            |          |          |          |
| p2 ( ${}^2A, C_1$ )                 |          |          |          | p3 ( ${}^1A_1, C_{3v}$ )                                   |          |          |          |
|                                     | X        | Y        | Z        |                                                            | X        | Y        | Z        |
| C                                   | -0.50861 | -0.00019 | -0.00242 | C                                                          | -1.1029  | -0.00111 | 0.00049  |
| C                                   | 0.690839 | -0.00011 | -0.00033 | C                                                          | 0.104101 | 0.000068 | -0.00084 |
| C                                   | 2.079731 | 0.00008  | 0.000754 | C                                                          | -2.55124 | 0.000343 | 0.000112 |
| C                                   | -1.96297 | 0.000133 | 0.000073 | H                                                          | -2.93705 | -0.65286 | -0.78422 |
| H                                   | 2.624271 | 0.928514 | 0.000653 | H                                                          | -2.93741 | -0.35158 | 0.958112 |
| H                                   | 2.624597 | -0.92816 | 0.0006   | H                                                          | -2.93527 | 1.006739 | -0.17396 |
| H                                   | -2.34351 | -0.01842 | 1.020372 | B                                                          | 1.572392 | 0.000427 | -0.00031 |
| H                                   | -2.34955 | 0.891808 | -0.48913 | O                                                          | 2.780998 | -0.00003 | 0.000379 |
| H                                   | -2.34978 | -0.87326 | -0.52098 |                                                            |          |          |          |
| BO ( ${}^2\Sigma^+, C_{\infty v}$ ) |          |          |          | CH <sub>3</sub> CCCH <sub>3</sub> ( ${}^1A_{1g}, D_{3d}$ ) |          |          |          |
|                                     | X        | Y        | Z        |                                                            | X        | Y        | Z        |
| B                                   | -1.1029  | 0.0000   | -0.74025 | C                                                          | 0.0000   | 0.0000   | 0.600493 |
| O                                   | 0.104101 | 0.0000   | 0.462655 | C                                                          | 0.0000   | 0.0000   | -0.60049 |
|                                     |          |          |          | C                                                          | 0.0000   | 0.0000   | -2.0574  |
|                                     |          |          |          | C                                                          | 0.0000   | 0.0000   | 2.057398 |
|                                     |          |          |          | H                                                          | 0.0000   | -1.01813 | -2.45197 |
|                                     |          |          |          | H                                                          | -0.88173 | 0.509066 | -2.45197 |
|                                     |          |          |          | H                                                          | 0.881729 | 0.509066 | -2.45197 |
|                                     |          |          |          | H                                                          | 0.0000   | 1.018133 | 2.451971 |
|                                     |          |          |          | H                                                          | -0.88173 | -0.50907 | 2.451971 |
|                                     |          |          |          | H                                                          | 0.881729 | -0.50907 | 2.451971 |

**Table S2:** Relative energies in  $\text{kJ mol}^{-1}$ . Geometries are optimized at B3LYP / cc-pVTZ (except i1 at CCSD/6-31G and p2 at MP2/cc-pVTZ)

| Structures                       | Relative Energy (kJ/mol) |                  |
|----------------------------------|--------------------------|------------------|
|                                  | B3LYP / cc-pVTZ          | CCSD(T)/ cc-pVTZ |
| BO+C <sub>4</sub> H <sub>6</sub> | 0.0                      | 0.0              |
| i1                               | -                        | -13.3            |
| i2                               | -185.4                   | -179.2           |
| i3                               | -189.7                   | -184.1           |
| ts-i2i3                          | -171.7                   | -158.8           |
| ts-i3p1                          | -28.4                    | -15.4            |
| ts-rp2                           | -7.8                     | 13.8             |
| ts-i3p3                          | -77.2                    | -59.2            |
| p1                               | -34.4                    | -29.2            |
| p2                               | -                        | -73.0            |
| p3                               | -121.5                   | -105.3           |

**Table S3:** Vibrational frequencies ( $\text{cm}^{-1}$ ) and infrared intensities ( $\text{km mol}^{-1}$ ) of the optimized structures of the  $\text{BOC}_4\text{H}_6$  PES calculated at B3LYP / cc-pVTZ (except i1 at CCSD/6-31G and p2 at MP2/cc-pVTZ)

| $\text{BO } (^2\Sigma^+, C_{\infty v})$                     |                 |                                                |                               |           |                          |
|-------------------------------------------------------------|-----------------|------------------------------------------------|-------------------------------|-----------|--------------------------|
| Normal modes                                                | symmetry        | Vibration mode                                 | Frequency( $\text{cm}^{-1}$ ) | Rel. inty | Inty ( $\text{km/mol}$ ) |
| $\nu_1$                                                     | $\Sigma$        | BO stretching                                  | 1918.8777                     | 1.0000    | 42.2019                  |
| $\text{CH}_3\text{CCCH}_3 (^1\text{A}_{1g}, \text{D}_{3d})$ |                 |                                                |                               |           |                          |
| Normal modes                                                | symmetry        | Vibration mode                                 | Frequency( $\text{cm}^{-1}$ ) | Rel. inty | Inty ( $\text{km/mol}$ ) |
| $\nu_1$                                                     | $\text{A}_{1u}$ | $\text{CH}_3$ rock + $\text{CH}_3$ rock        | 40.5229                       | 0.0000    | 0.0000                   |
| $\nu_2$                                                     | $\text{E}_u$    | CCCC wagging                                   | 203.0533                      | 0.1783    | 11.5784                  |
| $\nu_3$                                                     | $\text{E}_u$    | CCCC wagging                                   | 203.0557                      | 0.1783    | 11.5789                  |
| $\nu_4$                                                     | $\text{E}_g$    | CC twist                                       | 396.8454                      | 0.0000    | 0.0000                   |
| $\nu_5$                                                     | $\text{E}_g$    | CC twist                                       | 396.8464                      | 0.0000    | 0.0000                   |
| $\nu_6$                                                     | $\text{A}_{1g}$ | $\text{CH}_3(\text{CC})\text{CH}_3$ sym. str.  | 723.5814                      | 0.0000    | 0.0000                   |
| $\nu_7$                                                     | $\text{E}_u$    | HCH wagging                                    | 1054.6237                     | 0.0284    | 1.8428                   |
| $\nu_8$                                                     | $\text{E}_u$    | HCH twist                                      | 1054.6249                     | 0.0284    | 1.8429                   |
| $\nu_9$                                                     | $\text{E}_g$    | HCH wagging                                    | 1061.0520                     | 0.0000    | 0.0000                   |
| $\nu_{10}$                                                  | $\text{E}_g$    | HCH twist                                      | 1061.0530                     | 0.0000    | 0.0000                   |
| $\nu_{11}$                                                  | $\text{A}_{2u}$ | $\text{CH}_3(\text{CC})\text{CH}_3$ asym. str. | 1166.2010                     | 0.0003    | 0.0197                   |
| $\nu_{12}$                                                  | $\text{A}_{2u}$ | $\text{CH}_3$ wagging                          | 1417.8460                     | 0.0577    | 3.7473                   |
| $\nu_{13}$                                                  | $\text{A}_{1g}$ | $\text{CH}_3$ wagging                          | 1421.3228                     | 0.0000    | 0.0000                   |
| $\nu_{14}$                                                  | $\text{E}_g$    | HCH scissor                                    | 1481.6328                     | 0.0000    | 0.0000                   |
| $\nu_{15}$                                                  | $\text{E}_g$    | HCH scissor                                    | 1481.6329                     | 0.0000    | 0.0000                   |
| $\nu_{16}$                                                  | $\text{E}_u$    | HCH scissor + CH rock                          | 1481.9192                     | 0.2105    | 13.6733                  |
| $\nu_{17}$                                                  | $\text{E}_u$    | HCH scissor                                    | 1481.9193                     | 0.2105    | 13.6755                  |
| $\nu_{18}$                                                  | $\text{A}_{1g}$ | CC str.                                        | 2363.3183                     | 0.0000    | 0.0000                   |
| $\nu_{19}$                                                  | $\text{A}_{1g}$ | $\text{CH}_3$ sym. str.                        | 3020.2634                     | 0.0000    | 0.0000                   |
| $\nu_{20}$                                                  | $\text{A}_{2u}$ | $\text{CH}_3$ sym. str.                        | 3020.6426                     | 1.0000    | 64.9548                  |
| $\nu_{21}$                                                  | $\text{E}_g$    | HCH asym. str.                                 | 3073.1486                     | 0.0000    | 0.0000                   |
| $\nu_{22}$                                                  | $\text{E}_g$    | CH str. + HCH sym. str.                        | 3073.1487                     | 0.0000    | 0.0000                   |
| $\nu_{23}$                                                  | $\text{E}_u$    | HCH asym. str.                                 | 3073.7004                     | 0.3718    | 24.1506                  |
| $\nu_{24}$                                                  | $\text{E}_u$    | CH str. + HCH sym. str.                        | 3073.7005                     | 0.3717    | 24.1450                  |

**Table S3** (continued)

| $i1 (^2A, C_1)$ |          |                                                 |                               |           |               |
|-----------------|----------|-------------------------------------------------|-------------------------------|-----------|---------------|
| Normal modes    | symmetry | Vibration mode                                  | Frequency( $\text{cm}^{-1}$ ) | Rel. inty | Inty (km/mol) |
| v <sub>1</sub>  | A        | CH <sub>3</sub> rock                            | 17.1634                       | 0.0039    | 0.2137        |
| v <sub>2</sub>  | A        | CH <sub>3</sub> rock                            | 64.7128                       | 0.1967    | 10.7718       |
| v <sub>3</sub>  | A        | BC scissor                                      | 70.9337                       | 0.1356    | 7.4249        |
| v <sub>4</sub>  | A        | OCH <sub>3</sub> scissor                        | 92.6053                       | 0.0284    | 1.5559        |
| v <sub>5</sub>  | A        | CH <sub>3</sub> rock                            | 98.5337                       | 0.0722    | 3.9511        |
| v <sub>6</sub>  | A        | BCH <sub>3</sub> scissor                        | 160.5569                      | 1.0000    | 54.7581       |
| v <sub>7</sub>  | A        | CH <sub>3</sub> (CC)CH <sub>3</sub> wagging     | 185.7839                      | 0.1805    | 9.8860        |
| v <sub>8</sub>  | A        | H(CH <sub>2</sub> CCCH <sub>2</sub> )H scissor  | 211.9439                      | 0.4236    | 23.1962       |
| v <sub>9</sub>  | A        | CCCH <sub>3</sub> wagging                       | 214.1076                      | 0.0942    | 5.1561        |
| v <sub>10</sub> | A        | HCCC scissor                                    | 373.0468                      | 0.0035    | 0.1929        |
| v <sub>11</sub> | A        | CH <sub>3</sub> (CC)CH <sub>3</sub> sym. str.   | 714.2485                      | 0.0193    | 1.0577        |
| v <sub>12</sub> | A        | CH <sub>3</sub> twist. + CH <sub>3</sub> twist. | 1071.2102                     | 0.0046    | 0.2542        |
| v <sub>13</sub> | A        | CH <sub>3</sub> wagging                         | 1083.4200                     | 0.0252    | 1.3824        |
| v <sub>14</sub> | A        | CH <sub>3</sub> twist. + CH <sub>3</sub> twist. | 1109.1477                     | 0.0272    | 1.4870        |
| v <sub>15</sub> | A        | H(CH <sub>2</sub> CCCH <sub>2</sub> )H scissor  | 1111.4453                     | 0.0196    | 1.0742        |
| v <sub>16</sub> | A        | CH <sub>3</sub> (CC)CH <sub>3</sub> asym. str.  | 1147.7702                     | 0.1060    | 5.8026        |
| v <sub>17</sub> | A        | (CH <sub>3</sub> + CH <sub>3</sub> ) wagging    | 1474.7202                     | 0.0098    | 0.5384        |
| v <sub>18</sub> | A        | (CH <sub>3</sub> + CH <sub>3</sub> ) wagging    | 1481.3472                     | 0.0157    | 0.8596        |
| v <sub>19</sub> | A        | HCH scissor                                     | 1538.4540                     | 0.0747    | 4.0881        |
| v <sub>20</sub> | A        | HCH scissor                                     | 1539.7978                     | 0.1318    | 7.2164        |
| v <sub>21</sub> | A        | HCH scissor                                     | 1540.3557                     | 0.0961    | 5.2640        |
| v <sub>22</sub> | A        | HCH scissor                                     | 1542.6360                     | 0.1882    | 10.3039       |
| v <sub>23</sub> | A        | BO str.                                         | 1766.6075                     | 0.8046    | 44.0572       |
| v <sub>24</sub> | A        | CC str.                                         | 2313.7119                     | 0.1879    | 10.2908       |
| v <sub>25</sub> | A        | CH <sub>3</sub> sym. str.                       | 3010.8154                     | 0.4772    | 26.1315       |
| v <sub>26</sub> | A        | CH <sub>3</sub> sym. str.                       | 3013.9735                     | 0.4056    | 22.2080       |
| v <sub>27</sub> | A        | CH str. + HCH sym. str.                         | 3073.5749                     | 0.2811    | 15.3903       |
| v <sub>28</sub> | A        | HCH asym. str.                                  | 3078.7861                     | 0.3195    | 17.4969       |
| v <sub>29</sub> | A        | HCH asym. str.                                  | 3082.0027                     | 0.2946    | 16.1307       |
| v <sub>30</sub> | A        | CH str. + HCH sym. str.                         | 3089.3556                     | 0.1112    | 6.0878        |

**Table S3** (continued)

| $i_2 (^2A, C_1)$ |          |                                               |                               |           |               |
|------------------|----------|-----------------------------------------------|-------------------------------|-----------|---------------|
| Normal modes     | symmetry | Vibration mode                                | Frequency( $\text{cm}^{-1}$ ) | Rel. inty | Inty (km/mol) |
| v <sub>1</sub>   | A        | CH <sub>3</sub> rock                          | 105.5143                      | 0.0015    | 0.4884        |
| v <sub>2</sub>   | A        | O(BCC)C scissor                               | 116.1540                      | 0.0059    | 1.8998        |
| v <sub>3</sub>   | A        | CH <sub>3</sub> rock                          | 139.9685                      | 0.0006    | 0.2023        |
| v <sub>4</sub>   | A        | CH <sub>3</sub> (CC)CH <sub>3</sub> wagging   | 160.9345                      | 0.0000    | 0.0018        |
| v <sub>5</sub>   | A        | CH <sub>3</sub> (CC)CH <sub>3</sub> scissor   | 209.1200                      | 0.0119    | 3.8393        |
| v <sub>6</sub>   | A        | CCC wagging                                   | 376.4533                      | 0.0429    | 13.8385       |
| v <sub>7</sub>   | A        | CCCH <sub>3</sub> scissor                     | 431.0395                      | 0.0127    | 4.1013        |
| v <sub>8</sub>   | A        | B scissor                                     | 536.4192                      | 0.0709    | 22.8538       |
| v <sub>9</sub>   | A        | OBC wagging                                   | 554.7162                      | 0.0688    | 22.1636       |
| v <sub>10</sub>  | A        | HCCC scissor                                  | 677.2960                      | 0.0107    | 3.4408        |
| v <sub>11</sub>  | A        | CH rock + CH <sub>2</sub> wagging             | 932.0906                      | 0.0126    | 4.0574        |
| v <sub>12</sub>  | A        | CH <sub>2</sub> (CC)CH <sub>2</sub> twist.    | 1017.4145                     | 0.0006    | 0.1924        |
| v <sub>13</sub>  | A        | CH rock + CH <sub>2</sub> wagging             | 1017.5385                     | 0.0070    | 2.2400        |
| v <sub>14</sub>  | A        | CH <sub>2</sub> (CC)CH <sub>2</sub> twist.    | 1046.2926                     | 0.0006    | 0.1928        |
| v <sub>15</sub>  | A        | H(H <sub>2</sub> CCCH <sub>2</sub> )H scissor | 1061.5672                     | 0.0201    | 6.4687        |
| v <sub>16</sub>  | A        | HCC scissor                                   | 1158.1723                     | 0.0006    | 0.2021        |
| v <sub>17</sub>  | A        | CH <sub>3</sub> wagging                       | 1390.0675                     | 0.0018    | 0.5744        |
| v <sub>18</sub>  | A        | CH <sub>3</sub> wagging                       | 1405.0660                     | 0.0056    | 1.8091        |
| v <sub>19</sub>  | A        | CH rock + HCH scissor                         | 1452.3252                     | 0.0243    | 7.8197        |
| v <sub>20</sub>  | A        | HCH scissor                                   | 1463.1309                     | 0.0441    | 14.1984       |
| v <sub>21</sub>  | A        | CH rock + HCH scissor                         | 1483.5610                     | 0.0205    | 6.5918        |
| v <sub>22</sub>  | A        | HCH scissor                                   | 1491.6091                     | 0.0170    | 5.4804        |
| v <sub>23</sub>  | A        | CC str.                                       | 1730.7026                     | 0.1253    | 40.3602       |
| v <sub>24</sub>  | A        | OBC asym. str.                                | 2006.6654                     | 1.0000    | 322.2296      |
| v <sub>25</sub>  | A        | CH str. + HCH sym. str.                       | 2973.5426                     | 0.0479    | 15.4232       |
| v <sub>26</sub>  | A        | CH <sub>3</sub> sym. str.                     | 3032.3473                     | 0.0530    | 17.0764       |
| v <sub>27</sub>  | A        | CH str. + HCH sym. str.                       | 3053.2117                     | 0.0222    | 7.1584        |
| v <sub>28</sub>  | A        | HCH asym. str.                                | 3076.3089                     | 0.0123    | 3.9735        |
| v <sub>29</sub>  | A        | HCH asym. str.                                | 3087.1970                     | 0.0329    | 10.6064       |
| v <sub>30</sub>  | A        | CH str. + HCH sym. str.                       | 3114.0008                     | 0.0431    | 13.8784       |

**Table S3** (continued)

| $i3 (^2A, C_1)$ |          |                                             |                               |           |               |
|-----------------|----------|---------------------------------------------|-------------------------------|-----------|---------------|
| Normal modes    | symmetry | Vibration mode                              | Frequency( $\text{cm}^{-1}$ ) | Rel. inty | Inty (km/mol) |
| v <sub>1</sub>  | A        | O(BCCC)H scissor                            | 104.2153                      | 0.0259    | 6.5615        |
| v <sub>2</sub>  | A        | CH <sub>3</sub> (CC)CH <sub>3</sub> rock    | 136.8277                      | 0.0049    | 1.2306        |
| v <sub>3</sub>  | A        | CH <sub>3</sub> (CC)CH <sub>3</sub> rock    | 139.5327                      | 0.0004    | 0.1088        |
| v <sub>4</sub>  | A        | CH <sub>3</sub> (CC)CH <sub>3</sub> wagging | 219.9955                      | 0.0019    | 0.4833        |
| v <sub>5</sub>  | A        | C(CC)C scissor                              | 226.2133                      | 0.0113    | 2.8497        |
| v <sub>6</sub>  | A        | CCC wagging                                 | 296.4432                      | 0.0633    | 16.0197       |
| v <sub>7</sub>  | A        | B(CCC)H scissor                             | 412.5232                      | 0.0094    | 2.3788        |
| v <sub>8</sub>  | A        | OBC wagging                                 | 563.7091                      | 0.0692    | 17.5197       |
| v <sub>9</sub>  | A        | B scissor                                   | 570.5060                      | 0.0900    | 22.7815       |
| v <sub>10</sub> | A        | BC str.                                     | 647.5235                      | 0.0071    | 1.8014        |
| v <sub>11</sub> | A        | CH rock + CH <sub>2</sub> wagging           | 916.8875                      | 0.0041    | 1.0290        |
| v <sub>12</sub> | A        | HCH twist. + HCH twist.                     | 1024.6998                     | 0.0031    | 0.7914        |
| v <sub>13</sub> | A        | CH rock + CH <sub>2</sub> wagging           | 1043.3444                     | 0.0037    | 0.9319        |
| v <sub>14</sub> | A        | HCH twist. + HCH twist.                     | 1060.2710                     | 0.0007    | 0.1657        |
| v <sub>15</sub> | A        | C(CC)C asym. str.                           | 1086.0108                     | 0.0281    | 7.1027        |
| v <sub>16</sub> | A        | HCC scissor                                 | 1163.3009                     | 0.0032    | 0.8167        |
| v <sub>17</sub> | A        | CH <sub>3</sub> wagging                     | 1401.6374                     | 0.0139    | 3.5069        |
| v <sub>18</sub> | A        | CH <sub>3</sub> wagging                     | 1408.4352                     | 0.0024    | 0.5950        |
| v <sub>19</sub> | A        | CH rock + HCH scissor                       | 1451.2435                     | 0.0328    | 8.3040        |
| v <sub>20</sub> | A        | HCH scissor                                 | 1466.3204                     | 0.0558    | 14.1316       |
| v <sub>21</sub> | A        | HCH scissor                                 | 1485.9839                     | 0.0275    | 6.9496        |
| v <sub>22</sub> | A        | HCH scissor                                 | 1489.8642                     | 0.0315    | 7.9808        |
| v <sub>23</sub> | A        | CCstr.                                      | 1723.5544                     | 0.1427    | 36.1094       |
| v <sub>24</sub> | A        | OBC asym. str.                              | 1994.7442                     | 1.0000    | 253.1003      |
| v <sub>25</sub> | A        | CH str. + HCH sym. str.                     | 2972.6147                     | 0.0343    | 8.6753        |
| v <sub>26</sub> | A        | CH <sub>3</sub> sym. str.                   | 3030.5252                     | 0.0871    | 22.0469       |
| v <sub>27</sub> | A        | CH str. + HCH sym. str.                     | 3054.0986                     | 0.0265    | 6.7158        |
| v <sub>28</sub> | A        | HCH asym. str.                              | 3076.5684                     | 0.0191    | 4.8355        |
| v <sub>29</sub> | A        | HCH asym. str.                              | 3082.8126                     | 0.0491    | 12.4186       |
| v <sub>30</sub> | A        | CH str. + HCH sym. str.                     | 3116.2455                     | 0.0396    | 10.0334       |



**Table S3** (continued)

| ts-i2i3 ( <sup>2</sup> A, C <sub>1</sub> ) |          |                                                |                              |           |               |
|--------------------------------------------|----------|------------------------------------------------|------------------------------|-----------|---------------|
| Normal modes                               | symmetry | Vibration mode                                 | Frequency(cm <sup>-1</sup> ) | Rel. inty | Inty (km/mol) |
| v <sub>1</sub>                             | A        | CCCH <sub>3</sub> wagging                      | -260.3089                    | 0.0441    | 12.7193       |
| v <sub>2</sub>                             | A        | CH <sub>3</sub> rock                           | 35.3223                      | 0.0026    | 0.7591        |
| v <sub>3</sub>                             | A        | O(BCCCH <sub>2</sub> )H scissor                | 119.4633                     | 0.0198    | 5.7187        |
| v <sub>4</sub>                             | A        | CH <sub>3</sub> rock                           | 126.5908                     | 0.0020    | 0.5843        |
| v <sub>5</sub>                             | A        | CCCC wagging                                   | 183.6860                     | 0.0001    | 0.0392        |
| v <sub>6</sub>                             | A        | CH <sub>3</sub> (C)C scissor                   | 308.5065                     | 0.0034    | 0.9757        |
| v <sub>7</sub>                             | A        | CCCH <sub>3</sub> wagging                      | 349.0915                     | 0.0505    | 14.5555       |
| v <sub>8</sub>                             | A        | OBC wagging                                    | 525.0211                     | 0.0613    | 17.6674       |
| v <sub>9</sub>                             | A        | OBC wagging                                    | 558.4639                     | 0.0648    | 18.6753       |
| v <sub>10</sub>                            | A        | CH <sub>3</sub> (CC)CH <sub>3</sub> sym. str.  | 622.3863                     | 0.0041    | 1.1730        |
| v <sub>11</sub>                            | A        | HCH wagging                                    | 893.7439                     | 0.0130    | 3.7354        |
| v <sub>12</sub>                            | A        | HCH twist.                                     | 983.2945                     | 0.0037    | 1.0796        |
| v <sub>13</sub>                            | A        | HCH twist.                                     | 1025.9013                    | 0.0004    | 0.1278        |
| v <sub>14</sub>                            | A        | HCH scissor                                    | 1031.2975                    | 0.0084    | 2.4284        |
| v <sub>15</sub>                            | A        | CH <sub>3</sub> (CC)CH <sub>3</sub> asym. str. | 1051.4133                    | 0.0056    | 1.6046        |
| v <sub>16</sub>                            | A        | H(CH <sub>2</sub> )C scissor                   | 1132.3529                    | 0.0039    | 1.1134        |
| v <sub>17</sub>                            | A        | CH <sub>3</sub> wagging                        | 1395.7805                    | 0.0030    | 0.8623        |
| v <sub>18</sub>                            | A        | CH <sub>3</sub> wagging                        | 1405.7515                    | 0.0061    | 1.7525        |
| v <sub>19</sub>                            | A        | CH rock + HCH scissor                          | 1445.3498                    | 0.0273    | 7.8785        |
| v <sub>20</sub>                            | A        | HCH scissor                                    | 1465.9083                    | 0.0358    | 10.3012       |
| v <sub>21</sub>                            | A        | CH rock + HCH scissor                          | 1482.5794                    | 0.0229    | 6.5954        |
| v <sub>22</sub>                            | A        | HCH scissor                                    | 1488.0309                    | 0.0282    | 8.1318        |
| v <sub>23</sub>                            | A        | CCCH <sub>3</sub> asym. str.                   | 1802.8133                    | 0.0531    | 15.2870       |
| v <sub>24</sub>                            | A        | OBC asym. str.                                 | 1990.7428                    | 1.0000    | 288.1382      |
| v <sub>25</sub>                            | A        | CH <sub>3</sub> sym. str.                      | 2969.1739                    | 0.1124    | 32.3753       |
| v <sub>26</sub>                            | A        | HCH asym. str.                                 | 2999.9711                    | 0.0367    | 10.5668       |
| v <sub>27</sub>                            | A        | CH <sub>3</sub> sym. str.                      | 3027.1811                    | 0.0730    | 21.0341       |
| v <sub>28</sub>                            | A        | CH str. + HCH sym. str.                        | 3061.4649                    | 0.0124    | 3.5644        |
| v <sub>29</sub>                            | A        | HCH asym. str.                                 | 3083.4320                    | 0.0439    | 12.6597       |
| v <sub>30</sub>                            | A        | CH str. + HCH sym. str.                        | 3114.1160                    | 0.0413    | 11.8875       |

**Table S3** (continued)

| ts-i3p1 ( $^2A, C_1$ ) |          |                                 |                               |           |               |
|------------------------|----------|---------------------------------|-------------------------------|-----------|---------------|
| Normal modes           | symmetry | Vibration mode                  | Frequency( $\text{cm}^{-1}$ ) | Rel. inty | Inty (km/mol) |
| v <sub>1</sub>         | A        | HCstr.                          | -425.3244                     | 0.1227    | 37.0354       |
| v <sub>2</sub>         | A        | O(BCC)C scissor                 | 105.5384                      | 0.0188    | 5.6719        |
| v <sub>3</sub>         | A        | CH <sub>3</sub> rock            | 142.9957                      | 0.0043    | 1.2906        |
| v <sub>4</sub>         | A        | CH rock                         | 159.5844                      | 0.0117    | 3.5403        |
| v <sub>5</sub>         | A        | H(CCCCH <sub>2</sub> )H scissor | 186.9631                      | 0.0039    | 1.1738        |
| v <sub>6</sub>         | A        | CH rock                         | 232.9895                      | 0.0043    | 1.2899        |
| v <sub>7</sub>         | A        | CH rock                         | 279.6182                      | 0.0167    | 5.0313        |
| v <sub>8</sub>         | A        | CCC wagging                     | 372.5468                      | 0.0475    | 14.3363       |
| v <sub>9</sub>         | A        | OBC wagging                     | 500.5013                      | 0.0648    | 19.5394       |
| v <sub>10</sub>        | A        | BC twist.                       | 558.2799                      | 0.0608    | 18.3473       |
| v <sub>11</sub>        | A        | BCC scissor                     | 572.5767                      | 0.0433    | 13.0556       |
| v <sub>12</sub>        | A        | CH <sub>3</sub> (C)C scissor    | 667.7338                      | 0.0187    | 5.6304        |
| v <sub>13</sub>        | A        | HCH twist.                      | 689.0730                      | 0.0062    | 1.8751        |
| v <sub>14</sub>        | A        | HCH wagging                     | 894.1857                      | 0.1280    | 38.6165       |
| v <sub>15</sub>        | A        | HCH wagging                     | 973.6821                      | 0.0293    | 8.8432        |
| v <sub>16</sub>        | A        | HCH twist.                      | 1009.4419                     | 0.0002    | 0.0604        |
| v <sub>17</sub>        | A        | CH <sub>3</sub> twist.          | 1056.6001                     | 0.0000    | 0.0027        |
| v <sub>18</sub>        | A        | CH <sub>3</sub> C str.          | 1146.9044                     | 0.0031    | 0.9355        |
| v <sub>19</sub>        | A        | CCCH <sub>2</sub> sym. str.     | 1251.4465                     | 0.0060    | 1.8045        |
| v <sub>20</sub>        | A        | CH <sub>3</sub> wagging         | 1408.9435                     | 0.0147    | 4.4464        |
| v <sub>21</sub>        | A        | HCH scissor                     | 1455.0608                     | 0.0139    | 4.2000        |
| v <sub>22</sub>        | A        | CH rock + HCH scissor           | 1486.3324                     | 0.0238    | 7.1863        |
| v <sub>23</sub>        | A        | HCH scissor                     | 1496.2986                     | 0.0186    | 5.5986        |
| v <sub>24</sub>        | A        | CCCH <sub>2</sub> asym. str.    | 1993.4938                     | 0.6834    | 206.2183      |
| v <sub>25</sub>        | A        | OBC asym. str.                  | 2013.6140                     | 1.0000    | 301.7499      |
| v <sub>26</sub>        | A        | CH <sub>3</sub> sym. str.       | 3035.9823                     | 0.0580    | 17.5130       |
| v <sub>27</sub>        | A        | HCH asym. str.                  | 3090.6216                     | 0.0321    | 9.6782        |
| v <sub>28</sub>        | A        | CH str. + HCH sym. str.         | 3125.3479                     | 0.0213    | 6.4299        |
| v <sub>29</sub>        | A        | HCH sym. str.                   | 3128.2299                     | 0.0037    | 1.1173        |
| v <sub>30</sub>        | A        | HCH asym. str.                  | 3203.9608                     | 0.0030    | 0.8989        |

**Table S3** (continued)

| ts-i3p3 ( ${}^2A, C_1$ ) |          |                                                |                               |           |               |
|--------------------------|----------|------------------------------------------------|-------------------------------|-----------|---------------|
| Normal modes             | symmetry | Vibration mode                                 | Frequency( $\text{cm}^{-1}$ ) | Rel. inty | Inty (km/mol) |
| v <sub>1</sub>           | A        | CH <sub>3</sub> C scissor                      | -457.0682                     | 0.0490    | 16.7327       |
| v <sub>2</sub>           | A        | CH <sub>3</sub> rock                           | 44.0615                       | 0.0004    | 0.1522        |
| v <sub>3</sub>           | A        | CH <sub>3</sub> rock                           | 60.2302                       | 0.0004    | 0.1282        |
| v <sub>4</sub>           | A        | O(BCC)CH <sub>3</sub> scissor                  | 102.2881                      | 0.0000    | 0.0086        |
| v <sub>5</sub>           | A        | HCH <sub>2</sub> (CC)CH <sub>2</sub> H scissor | 116.8520                      | 0.0022    | 0.7662        |
| v <sub>6</sub>           | A        | O(BCC)CH <sub>3</sub> wagging                  | 135.3127                      | 0.0001    | 0.0382        |
| v <sub>7</sub>           | A        | CCC wagging                                    | 335.8804                      | 0.0423    | 14.4455       |
| v <sub>8</sub>           | A        | HCH twist.                                     | 369.2590                      | 0.0317    | 10.8294       |
| v <sub>9</sub>           | A        | OBC wagging                                    | 466.4102                      | 0.0921    | 31.4437       |
| v <sub>10</sub>          | A        | HCH twist.                                     | 509.8007                      | 0.0681    | 23.2606       |
| v <sub>11</sub>          | A        | HCH wagging                                    | 564.6313                      | 0.0082    | 2.7857        |
| v <sub>12</sub>          | A        | HCH twist.                                     | 566.7575                      | 0.0178    | 6.0694        |
| v <sub>13</sub>          | A        | B(CC)CH <sub>3</sub> sym. str.                 | 627.9563                      | 0.0172    | 5.8759        |
| v <sub>14</sub>          | A        | CH <sub>3</sub> wagging                        | 909.8527                      | 0.0140    | 4.7817        |
| v <sub>15</sub>          | A        | HCH wagging                                    | 1026.8432                     | 0.0189    | 6.4544        |
| v <sub>16</sub>          | A        | HCH scissor                                    | 1047.9378                     | 0.0055    | 1.8949        |
| v <sub>17</sub>          | A        | B(CC)CH <sub>3</sub> asym. str.                | 1095.0084                     | 0.0023    | 0.7981        |
| v <sub>18</sub>          | A        | CH <sub>3</sub> wagging                        | 1409.4475                     | 0.0075    | 2.5760        |
| v <sub>19</sub>          | A        | HCH scissor                                    | 1421.1976                     | 0.0092    | 3.1290        |
| v <sub>20</sub>          | A        | CH rock + HCH scissor                          | 1422.7698                     | 0.0085    | 2.8899        |
| v <sub>21</sub>          | A        | HCH scissor                                    | 1463.8629                     | 0.0374    | 12.7855       |
| v <sub>22</sub>          | A        | CH rock + HCH scissor                          | 1464.4277                     | 0.0253    | 8.6442        |
| v <sub>23</sub>          | A        | OBC asym. str. + CCC<br>asym. str.             | 1978.0423                     | 0.4591    | 156.7942      |
| v <sub>24</sub>          | A        | OBC asym. str. + CCC<br>asym. str.             | 2141.4102                     | 1.0000    | 341.5476      |
| v <sub>25</sub>          | A        | CH <sub>3</sub> sym. str.                      | 3005.4462                     | 0.0450    | 15.3822       |
| v <sub>26</sub>          | A        | CH str. + HCH sym. str.                        | 3062.7161                     | 0.0078    | 2.6627        |
| v <sub>27</sub>          | A        | HCH asym. str.                                 | 3083.7886                     | 0.0071    | 2.4081        |
| v <sub>28</sub>          | A        | CH <sub>3</sub> sym. str.                      | 3092.1202                     | 0.0009    | 0.2935        |
| v <sub>29</sub>          | A        | CH str. + HCH sym. str.                        | 3247.8565                     | 0.0087    | 2.9552        |
| v <sub>30</sub>          | A        | HCH asym. str.                                 | 3252.2649                     | 0.0111    | 3.8034        |

**Table S3** (continued)

| ts-rp2 ( <sup>2</sup> A, C <sub>1</sub> ) |          |                                  |                              |           |               |
|-------------------------------------------|----------|----------------------------------|------------------------------|-----------|---------------|
| Normal modes                              | symmetry | Vibration mode                   | Frequency(cm <sup>-1</sup> ) | Rel. inty | Inty (km/mol) |
| v <sub>1</sub>                            | A        | BHC asym. str.                   | -405.6268                    | 0.4169    | 195.6602      |
| v <sub>2</sub>                            | A        | CH <sub>3</sub> rock             | 21.2748                      | 0.0009    | 0.4349        |
| v <sub>3</sub>                            | A        | OB rock                          | 31.3692                      | 0.0145    | 6.8197        |
| v <sub>4</sub>                            | A        | HBO wagging                      | 33.4853                      | 0.0201    | 9.4222        |
| v <sub>5</sub>                            | A        | HCH <sub>2</sub> (CCCH)B scissor | 101.6796                     | 0.0132    | 6.2019        |
| v <sub>6</sub>                            | A        | CCCC wagging                     | 200.4916                     | 0.0264    | 12.4056       |
| v <sub>7</sub>                            | A        | HCH <sub>2</sub> (CCC)H scissor  | 233.7498                     | 0.0119    | 5.6056        |
| v <sub>8</sub>                            | A        | CCC wagging                      | 381.2081                     | 0.0000    | 0.0171        |
| v <sub>9</sub>                            | A        | CCC wagging                      | 426.9772                     | 0.0062    | 2.8914        |
| v <sub>10</sub>                           | A        | HCH <sub>2</sub> rock            | 432.0808                     | 0.0002    | 0.1008        |
| v <sub>11</sub>                           | A        | CH <sub>3</sub> (CC)C sym. str.  | 742.2329                     | 0.0056    | 2.6459        |
| v <sub>12</sub>                           | A        | BHC asym. str.                   | 823.8847                     | 1.0000    | 469.2827      |
| v <sub>13</sub>                           | A        | HCH wagging                      | 1044.9109                    | 0.0099    | 4.6623        |
| v <sub>14</sub>                           | A        | HCH twist.                       | 1049.6177                    | 0.0012    | 0.5473        |
| v <sub>15</sub>                           | A        | HCH twist.                       | 1066.6733                    | 0.0007    | 0.3273        |
| v <sub>16</sub>                           | A        | HCH wagging                      | 1071.7783                    | 0.0310    | 14.5449       |
| v <sub>17</sub>                           | A        | CH <sub>3</sub> (CC)C asym. str. | 1191.3063                    | 0.0069    | 3.2389        |
| v <sub>18</sub>                           | A        | HCH twist.                       | 1327.3992                    | 0.0010    | 0.4489        |
| v <sub>19</sub>                           | A        | HCH wagging                      | 1399.4276                    | 0.0651    | 30.5674       |
| v <sub>20</sub>                           | A        | CH <sub>3</sub> wagging          | 1417.9607                    | 0.0039    | 1.8445        |
| v <sub>21</sub>                           | A        | HCH scissor                      | 1459.1494                    | 0.0212    | 9.9519        |
| v <sub>22</sub>                           | A        | CH rock + HCH scissor            | 1474.6644                    | 0.0171    | 8.0155        |
| v <sub>23</sub>                           | A        | HCH scissor                      | 1476.8403                    | 0.0155    | 7.2536        |
| v <sub>24</sub>                           | A        | BO str.                          | 1917.4500                    | 0.3077    | 144.4125      |
| v <sub>25</sub>                           | A        | CC str.                          | 2317.9964                    | 0.2604    | 122.1936      |
| v <sub>26</sub>                           | A        | CH <sub>3</sub> sym. str.        | 3025.4606                    | 0.0362    | 17.0012       |
| v <sub>27</sub>                           | A        | HCH sym. str.                    | 3060.0929                    | 0.0255    | 11.9873       |
| v <sub>28</sub>                           | A        | CH str. + HCH sym. str.          | 3079.4701                    | 0.0171    | 8.0378        |
| v <sub>29</sub>                           | A        | HCH asym. str.                   | 3085.0498                    | 0.0142    | 6.6715        |
| v <sub>30</sub>                           | A        | HCH asym. str.                   | 3118.4285                    | 0.0041    | 1.9053        |

**Table S3** (continued)

| p1 ( <sup>1</sup> A, C <sub>1</sub> ) |          |                                             |                              |           |               |
|---------------------------------------|----------|---------------------------------------------|------------------------------|-----------|---------------|
| Normal modes                          | symmetry | Vibration mode                              | Frequency(cm <sup>-1</sup> ) | Rel. inty | Inty (km/mol) |
| v <sub>1</sub>                        | A        | OB(CC)C scissor                             | 114.1491                     | 0.0104    | 3.5750        |
| v <sub>2</sub>                        | A        | CH <sub>3</sub> rock                        | 138.2513                     | 0.0015    | 0.5077        |
| v <sub>3</sub>                        | A        | CH <sub>3</sub> (CC)CH <sub>2</sub> wagging | 194.1494                     | 0.0008    | 0.2707        |
| v <sub>4</sub>                        | A        | CH <sub>2</sub> H(CC)C scissor              | 215.7737                     | 0.0100    | 3.4420        |
| v <sub>5</sub>                        | A        | CCCH <sub>2</sub> wagging                   | 372.8974                     | 0.0431    | 14.8894       |
| v <sub>6</sub>                        | A        | B scissor                                   | 498.3565                     | 0.0482    | 16.6402       |
| v <sub>7</sub>                        | A        | CH <sub>2</sub> twist.                      | 545.3442                     | 0.0365    | 12.5893       |
| v <sub>8</sub>                        | A        | BCC scissor                                 | 572.0696                     | 0.0223    | 7.7001        |
| v <sub>9</sub>                        | A        | CH <sub>2</sub> twist.                      | 630.7658                     | 0.0232    | 8.0113        |
| v <sub>10</sub>                       | A        | CH <sub>3</sub> CC scissor                  | 672.0292                     | 0.0100    | 3.4673        |
| v <sub>11</sub>                       | A        | CH <sub>2</sub> wagging                     | 876.9321                     | 0.1495    | 51.5931       |
| v <sub>12</sub>                       | A        | HCH wagging                                 | 975.6261                     | 0.0262    | 9.0460        |
| v <sub>13</sub>                       | A        | CH <sub>2</sub> twist.                      | 1004.6008                    | 0.0002    | 0.0739        |
| v <sub>14</sub>                       | A        | CH <sub>3</sub> twist.                      | 1059.0565                    | 0.0000    | 0.0050        |
| v <sub>15</sub>                       | A        | H(CH <sub>2</sub> )C scissor                | 1158.0371                    | 0.0017    | 0.5841        |
| v <sub>16</sub>                       | A        | CCC sym. str.                               | 1265.3308                    | 0.0008    | 0.2737        |
| v <sub>17</sub>                       | A        | CH <sub>3</sub> wagging                     | 1410.8227                    | 0.0051    | 1.7686        |
| v <sub>18</sub>                       | A        | HCH scissor                                 | 1458.8985                    | 0.0098    | 3.3806        |
| v <sub>19</sub>                       | A        | HCH scissor                                 | 1486.1089                    | 0.0205    | 7.0798        |
| v <sub>20</sub>                       | A        | HCH scissor                                 | 1498.0188                    | 0.0181    | 6.2533        |
| v <sub>21</sub>                       | A        | BO str.                                     | 2012.5092                    | 1.0000    | 345.1774      |
| v <sub>22</sub>                       | A        | CCC asym. str.                              | 2029.3693                    | 0.2659    | 91.7659       |
| v <sub>23</sub>                       | A        | CH <sub>3</sub> sym. str.                   | 3034.0928                    | 0.0579    | 19.9810       |
| v <sub>24</sub>                       | A        | CH <sub>3</sub> asym. str.                  | 3087.4775                    | 0.0310    | 10.6959       |
| v <sub>25</sub>                       | A        | CH str. + HCH sym. str.                     | 3121.4793                    | 0.0230    | 7.9475        |
| v <sub>26</sub>                       | A        | CH <sub>2</sub> sym. str.                   | 3124.3059                    | 0.0003    | 0.1016        |
| v <sub>27</sub>                       | A        | CH <sub>2</sub> asym. str.                  | 3197.1424                    | 0.0000    | 0.0004        |

**Table S3** (continued)

| p2 ( <sup>2</sup> A, C <sub>1</sub> ) |          |                                                |                              |           |               |
|---------------------------------------|----------|------------------------------------------------|------------------------------|-----------|---------------|
| Normal modes                          | symmetry | Vibration mode                                 | Frequency(cm <sup>-1</sup> ) | Rel. inty | Inty (km/mol) |
| v <sub>1</sub>                        | A        | CH <sub>3</sub> rock + CH <sub>2</sub> rock    | 11.6318                      | 0.0002    | 0.0131        |
| v <sub>2</sub>                        | A        | CCCC wagging                                   | 231.4199                     | 0.1428    | 9.8006        |
| v <sub>3</sub>                        | A        | CCCC wagging                                   | 234.3984                     | 0.1648    | 11.3133       |
| v <sub>4</sub>                        | A        | CCC wagging                                    | 455.5229                     | 0.0008    | 0.0521        |
| v <sub>5</sub>                        | A        | CCC wagging                                    | 489.1534                     | 0.0371    | 2.5443        |
| v <sub>6</sub>                        | A        | HCH wagging                                    | 607.7431                     | 0.6902    | 47.3797       |
| v <sub>7</sub>                        | A        | CH <sub>3</sub> (CC)CH <sub>2</sub> sym. str.  | 796.0374                     | 0.0228    | 1.5678        |
| v <sub>8</sub>                        | A        | HCH twist.                                     | 1064.2779                    | 0.0100    | 0.6850        |
| v <sub>9</sub>                        | A        | CH <sub>3</sub> wagging                        | 1066.1753                    | 0.0237    | 1.6278        |
| v <sub>10</sub>                       | A        | CH <sub>3</sub> twist.                         | 1075.5441                    | 0.0117    | 0.8057        |
| v <sub>11</sub>                       | A        | CH <sub>3</sub> (CC)CH <sub>2</sub> asym. str. | 1226.7406                    | 0.0970    | 6.6586        |
| v <sub>12</sub>                       | A        | CH <sub>3</sub> wagging                        | 1422.3379                    | 0.0545    | 3.7401        |
| v <sub>13</sub>                       | A        | HCH scissor                                    | 1488.5319                    | 0.0100    | 0.6877        |
| v <sub>14</sub>                       | A        | HCH scissor                                    | 1497.3595                    | 0.1177    | 8.0796        |
| v <sub>15</sub>                       | A        | HCH scissor                                    | 1497.3820                    | 0.1150    | 7.8921        |
| v <sub>16</sub>                       | A        | CC str.                                        | 2518.9362                    | 1.0000    | 68.6490       |
| v <sub>17</sub>                       | A        | CH <sub>3</sub> sym. str.                      | 3082.6149                    | 0.2261    | 15.5228       |
| v <sub>18</sub>                       | A        | CH str. + HCH sym. str.                        | 3163.3220                    | 0.0527    | 3.6200        |
| v <sub>19</sub>                       | A        | HCH asym. str.                                 | 3173.1787                    | 0.0536    | 3.6790        |
| v <sub>20</sub>                       | A        | CH <sub>2</sub> sym. str.                      | 3227.2499                    | 0.0821    | 5.6387        |
| v <sub>21</sub>                       | A        | CH <sub>2</sub> asym. str.                     | 3337.4809                    | 0.0008    | 0.0540        |

**Table S3** (continued)

| p3 ( ${}^1A_1, C_{3v}$ )             |          |                                             |                               |           |               |
|--------------------------------------|----------|---------------------------------------------|-------------------------------|-----------|---------------|
| Normal modes                         | symmetry | Vibration mode                              | Frequency( $\text{cm}^{-1}$ ) | Rel. inty | Inty (km/mol) |
| $\nu_1$                              | A        | CCCBO wagging                               | 124.2380                      | 0.0005    | 0.1705        |
| $\nu_2$                              | A        | CCCBO wagging                               | 124.5526                      | 0.0005    | 0.1732        |
| $\nu_3$                              | A        | CCC wagging                                 | 368.5313                      | 0.0420    | 14.1025       |
| $\nu_4$                              | A        | CCC wagging                                 | 368.7932                      | 0.0421    | 14.1134       |
| $\nu_5$                              | A        | CBO wagging                                 | 526.3616                      | 0.0955    | 32.0571       |
| $\nu_6$                              | A        | CBO wagging                                 | 526.3817                      | 0.0955    | 32.0471       |
| $\nu_7$                              | A        | $\text{CH}_3(\text{CC})\text{BO}$ sym. str. | 610.4125                      | 0.0058    | 1.9626        |
| $\nu_8$                              | A        | HCH scissor                                 | 1049.7847                     | 0.0061    | 2.0459        |
| $\nu_9$                              | A        | HCH wagging                                 | 1050.0259                     | 0.0061    | 2.0464        |
| $\nu_{10}$                           | A        | $\text{OCCCH}_3$ asym. str.                 | 1103.3084                     | 0.0012    | 0.4087        |
| $\nu_{11}$                           | A        | $\text{CH}_3$ wagging                       | 1413.6175                     | 0.0000    | 0.0049        |
| $\nu_{12}$                           | A        | HCH scissor                                 | 1468.2738                     | 0.0292    | 9.7834        |
| $\nu_{13}$                           | A        | HCH scissor                                 | 1468.4686                     | 0.0292    | 9.7818        |
| $\nu_{14}$                           | A        | BO str. + CC str.                           | 2011.6517                     | 0.8596    | 288.4410      |
| $\nu_{15}$                           | A        | BCC asym. str.                              | 2330.4716                     | 1.0000    | 335.5485      |
| $\nu_{16}$                           | A        | $\text{CH}_3$ sym. str.                     | 3031.4396                     | 0.0121    | 4.0739        |
| $\nu_{17}$                           | A        | CH str. + HCH sym. str.                     | 3092.7363                     | 0.0049    | 1.6393        |
| $\nu_{18}$                           | A        | HCH asym. str.                              | 3093.1367                     | 0.0049    | 1.6299        |
| HBO ( ${}^1\Sigma^+, C_{\infty v}$ ) |          |                                             |                               |           |               |
| Normal modes                         | symmetry | Vibration mode                              | Frequency( $\text{cm}^{-1}$ ) | Rel. inty | Inty (km/mol) |
| $\nu_1$                              | $\Pi$    | H scissor                                   | 778.9805                      | 0.2037    | 12.3311       |
| $\nu_2$                              | $\Pi$    | H scissor                                   | 778.9805                      | 0.2037    | 12.3311       |
| $\nu_3$                              | $\Sigma$ | OB str.                                     | 1867.9283                     | 1.0000    | 60.5290       |
| $\nu_4$                              | $\Sigma$ | BH str.                                     | 2895.6010                     | 0.1505    | 9.1070        |
